# Supplementary material
Source: Springer Nature journal article supplement (https://www.springermedizin.de/resource/supplementary/12894_2013_286_MOESM5_ESM.pdf/9513376)

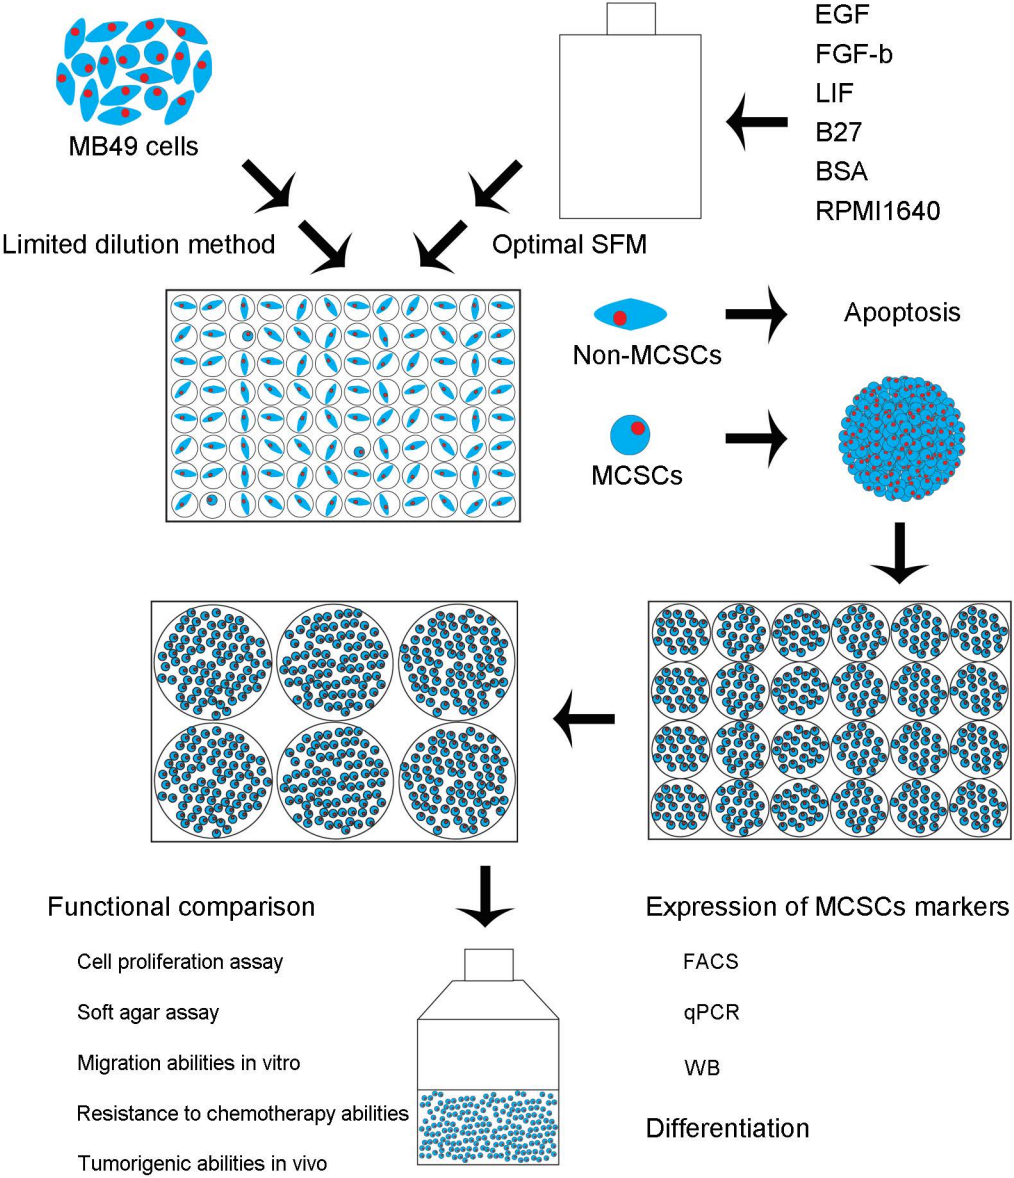

Supplement: MOESM5 [file 9513376]
